# Supplementary material for: Photocatalytic aerobic α-oxygenation of amides to imides using a highly durable decatungstate tetraphenylphosphonium salt
Source: Royal Society of Chemistry journal article supplement (doi:10.1039/d4cc01016g), 2024-01-01
Supplement: d4cc01016g1.pdf [file d4cc01016g1.pdf]

*Electronic Supplementary Information (ESI) for*

## **Photocatalytic aerobic $\alpha$ -oxygenation of amides to imides using a highly durable decatungstate tetraphenylphosphonium salt**

Chen Gu, Takafumi Yatabe, Kazuya Yamaguchi and Kosuke Suzuki\*

*Department of Applied Chemistry, School of Engineering, The University of Tokyo, 7-3-1 Hongo, Bunkyo-ku, Tokyo 113-8656, Japan.*

### **Contents**

|                                                                    | Page |
|--------------------------------------------------------------------|------|
| 1. Experimental.....                                               | S2   |
| 2. Characterization of TPPW10.....                                 | S4   |
| 3. Photocatalytic reaction setup.....                              | S7   |
| 4. Recovery of TPPW10 after the photocatalytic reaction.....       | S8   |
| 5. Degradation of TBAW10 after the photocatalytic reaction.....    | S10  |
| 6. <sup>18</sup> O isotope labelling experiments.....              | S11  |
| 7. Comparison with previously reported photocatalytic systems..... | S12  |
| 8. Radical scavenger test.....                                     | S13  |
| 9. Product data.....                                               | S14  |
| 10. References.....                                                | S22  |

# 1. Experimental

## Reagents

Tetraphenylphosphonium bromide (TPPBr), *N*-methylphthalimide, benzophenone, xanthone, anthraquinone, 2-chloroanthraquinone, acetonitrile-*d*<sub>3</sub> (CD<sub>3</sub>CN), 2-pyrrolidone, 1-ethyl-2-pyrrolidone, 1-phenyl-2-pyrrolidone, 2-piperidone, *N*-methylacetamide, *N*-methylbenzamide, and *N*-benzylacetamide were obtained from Tokyo Chemical Industry. Acetonitrile and acetone were obtained from Kanto Chemical. Eosin Y, 1-methyl-2-piperidone, and water-<sup>18</sup>O (97 atom% <sup>18</sup>O) were obtained from Sigma-Aldrich. 1-Methyl-2-pyrrolidone was obtained from FUJIFILM Wako Pure Chemical. TiO<sub>2</sub> (P25) was obtained from Ishihara Sangyo. <sup>18</sup>O<sub>2</sub> (98 atom% <sup>18</sup>O) was obtained from Taiyo Nippon Sanso. These reagents were used as received. TBA<sub>4</sub>[W<sub>10</sub>O<sub>32</sub>] (TBAW10),<sup>S1</sup> TBA<sub>3</sub>[ $\alpha$ -PW<sub>12</sub>O<sub>40</sub>],<sup>S2</sup> and TBA<sub>4</sub>H[ $\gamma$ -PV<sub>2</sub>W<sub>10</sub>O<sub>40</sub>]<sup>S3</sup> were synthesized according to the reported procedures, and characterized by ESI-MS, IR, and/or NMR spectra.

## Instruments

Positive-ion electrospray ionization mass spectrometry (ESI-MS) spectra were measured on JEOL JMS-T100CS spectrometer. IR spectra were measured on JASCO FT/IR-4100 using KBr disks. UV-vis spectra were measured on JASCO V-770 using a quartz cell of 1 cm path length. Gas chromatography (GC) analyses were conducted by Shimadzu GC-2025 equipped with a flame ionization detector (FID) with an InertCap5 capillary column using N<sub>2</sub> as carrier gas. GC mass spectrometry (GC-MS) spectra were measured on Shimadzu GCMS-QP2020 with an InertCap5 capillary column at an ionization voltage of 70 eV. <sup>1</sup>H and <sup>31</sup>P NMR spectra were measured on JEOL ECA-500 spectrometer (<sup>1</sup>H, 500.16 MHz; <sup>31</sup>P, 202.47 MHz) using 5 mm tubes. Chemical shifts ( $\delta$ ) were reported in ppm from tetramethylsilane for <sup>1</sup>H NMR spectra and from H<sub>3</sub>PO<sub>4</sub> (solvent, D<sub>2</sub>O) for <sup>31</sup>P NMR spectra.

## Synthesis of TPP<sub>4</sub>[W<sub>10</sub>O<sub>32</sub>] (TPPW10)

Sodium tungstate (Na<sub>2</sub>WO<sub>4</sub>·2H<sub>2</sub>O, 16 g) and water (100 mL) were added into a 300 mL-round flask, and the resultant solution was heated to approximately 100 °C with stirring. Hot 3M HCl aqueous solution (33.5 mL) was quickly added to the solution. After stirring the solution for a few minutes, hot tetraphenylphosphonium bromide (TPPBr) aqueous solution (10.4 g of TPPBr in 30 mL of hot water) was added to the reaction solution. The solution was vigorously stirred and filtrated to collect the precipitate. The white solid was successively washed with hot water (90 °C, 100 mL), water (100 mL), ethanol (50 mL), and diethyl ether (50 mL). The solid was dried in vacuo for 3 h, then freeze dried over night to obtain TPPW10 (16 g, 89% yield based on W). Single crystals suitable for the X-ray diffraction analysis were obtained by recrystallization of the product in a mixed solvent of acetonitrile and diethyl ether. ESI-MS: *m/z* 2193.4 ([TPP<sub>6</sub>W<sub>10</sub>O<sub>32</sub>]<sup>2+</sup>), 4047.0 ([TPP<sub>5</sub>W<sub>10</sub>O<sub>32</sub>]<sup>+</sup>). IR (KBr): 1167, 1632, 1586, 1484, 1438, 1338, 1320, 1190, 1109, 997, 958, 900, 802, 753, 724, 689, 528, 436, 402, 335 cm<sup>-1</sup>. UV-vis (CH<sub>3</sub>CN): 324 nm. <sup>1</sup>H NMR (CD<sub>3</sub>CN): 7.93 (m, 4H), 7.76 (m, 8H), 7.69 (m, 8H) ppm. <sup>31</sup>P NMR (CD<sub>3</sub>CN): 23.3 ppm.

### Single-crystal X-ray diffraction analysis

Diffraction measurements for the single crystals of TPPW10 were performed on a Rigaku XtaLab Synergy-R diffractometer with rotating-anode Mo K $\alpha$  radiation ( $\lambda = 0.71073$  Å, 50 kV, 24 mA) at  $-180$  °C. The data were collected and processed using CrysAlisPro.<sup>S4</sup> In the reduction of data, Lorentz and polarization corrections were made. Structural analyses were performed using Olex2.<sup>S5</sup> All structures were solved by SHELXS and refined by SHELXL-2018/3.<sup>S6</sup> All non-hydrogen atoms were refined anisotropically. CCDC-2336024 contains the crystallographic data for TPPW10. These data can be obtained free of charge from The Cambridge Crystallographic Data Centre via [www.ccdc.cam.ac.uk/data\\_request/cif](http://www.ccdc.cam.ac.uk/data_request/cif).

### Typical procedure for photocatalytic aerobic $\alpha$ -oxygenation of amides to imides

Into a glass test tube, substrate (amide, 0.6 mmol), TPPW10 (0.7 mol%), acetonitrile (3 mL) and a Teflon-coated magnetic stir bar were added, then heated at 50 °C for a few minutes to dissolve the substrate and TPPW10. The test tube was placed in a water bath and photo-irradiated using a xenon lamp ( $\lambda > 350$  nm, Excelitas Technologies PE300BFA) or LED ( $\lambda = 365$  nm and 405 nm, Asahi Spectra Co., Ltd.) for 4 h under open air (Fig. S7). Detailed reaction conditions are described in the footnotes of tables and figures. After the photocatalytic reaction, *N*-methylphthalimide was added to the reaction solution as internal standard. The reaction solution was diluted with acetone for GC and GC-MS measurements. The conversion of substrate and yields of products were determined with GC by using internal standard technique. The products were identified by the retention time of GC, GC-MS spectra, and <sup>1</sup>H NMR spectra. Several products were isolated by silica gel column chromatography.

### Recovery of TPPW10 after the photocatalytic reaction

After the photocatalytic oxidation of **1a** for 4 h using TPPW10 as photocatalyst in acetonitrile (3 mL), the reaction solution was diluted with acetonitrile (1 mL) then added into ethyl acetate (15 mL). The solution was allowed to stand for 5 min and the precipitated TPPW10 was collected by filtration. Recovered TPPW10 was vacuum dried and characterized by IR, ESI-MS, and NMR spectra.

## 2. Characterization of TPPW10

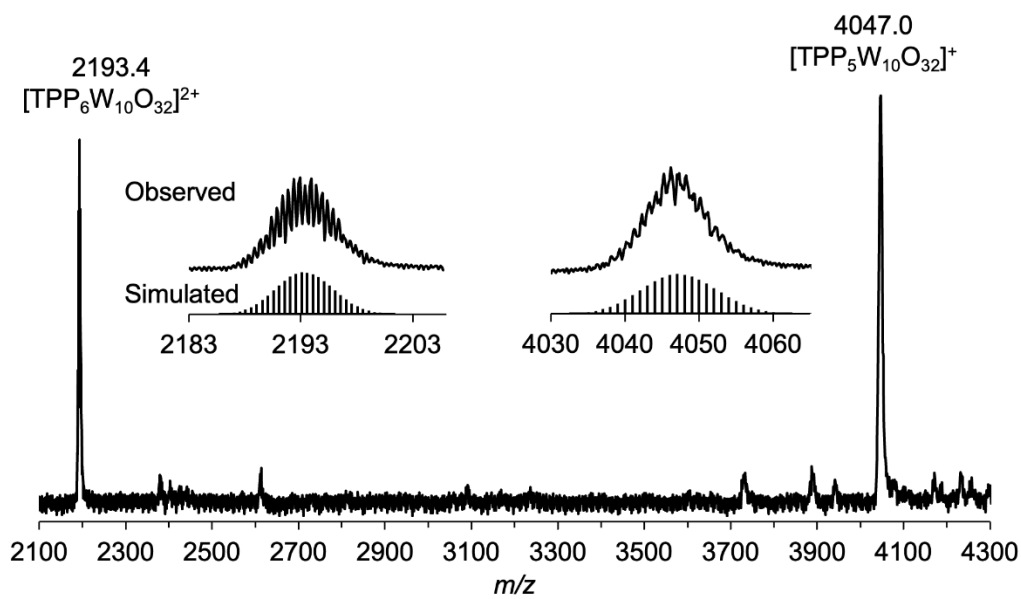

Fig. S1 Positive-ion ESI-MS spectrum of TPPW10 in CH<sub>3</sub>CN.

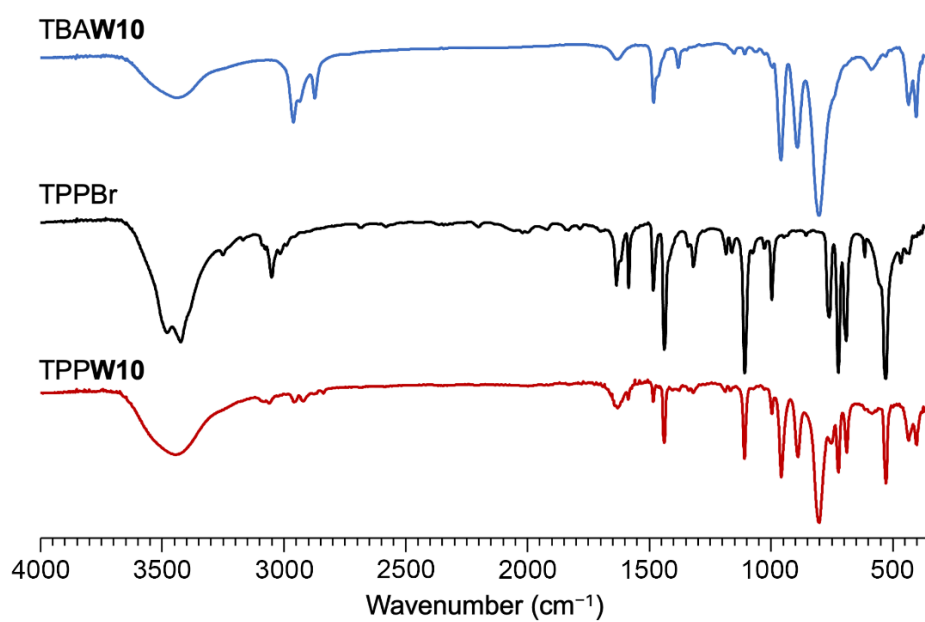

Fig. S2 IR spectra of TBAW10, TPPBr, and TPPW10 (KBr disc).

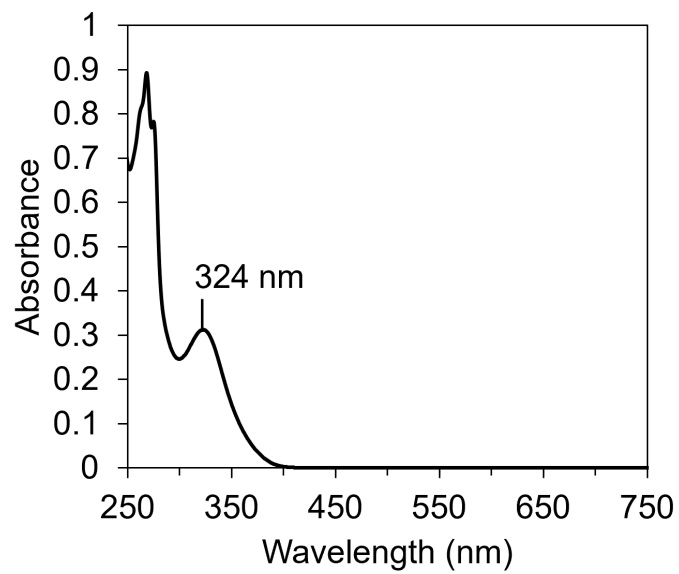

**Fig. S3** UV-vis spectrum of TPPW10 in CH<sub>3</sub>CN (0.03 mM).

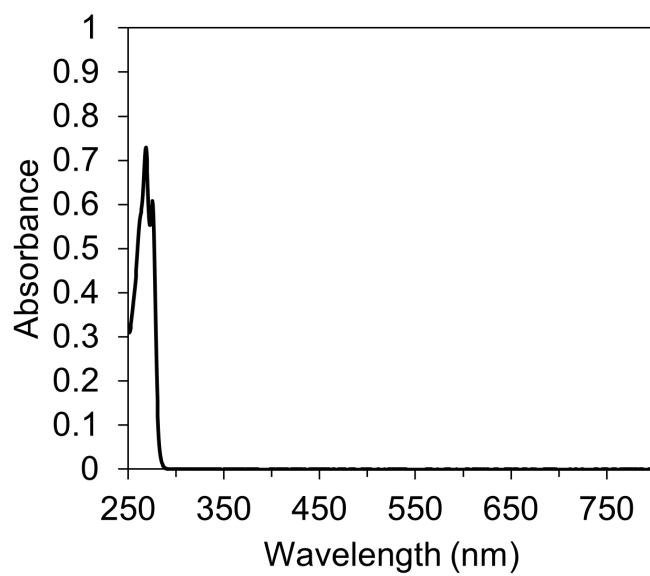

**Fig. S4** UV-vis spectrum of TPPBr in CH<sub>3</sub>CN (1.0 M).

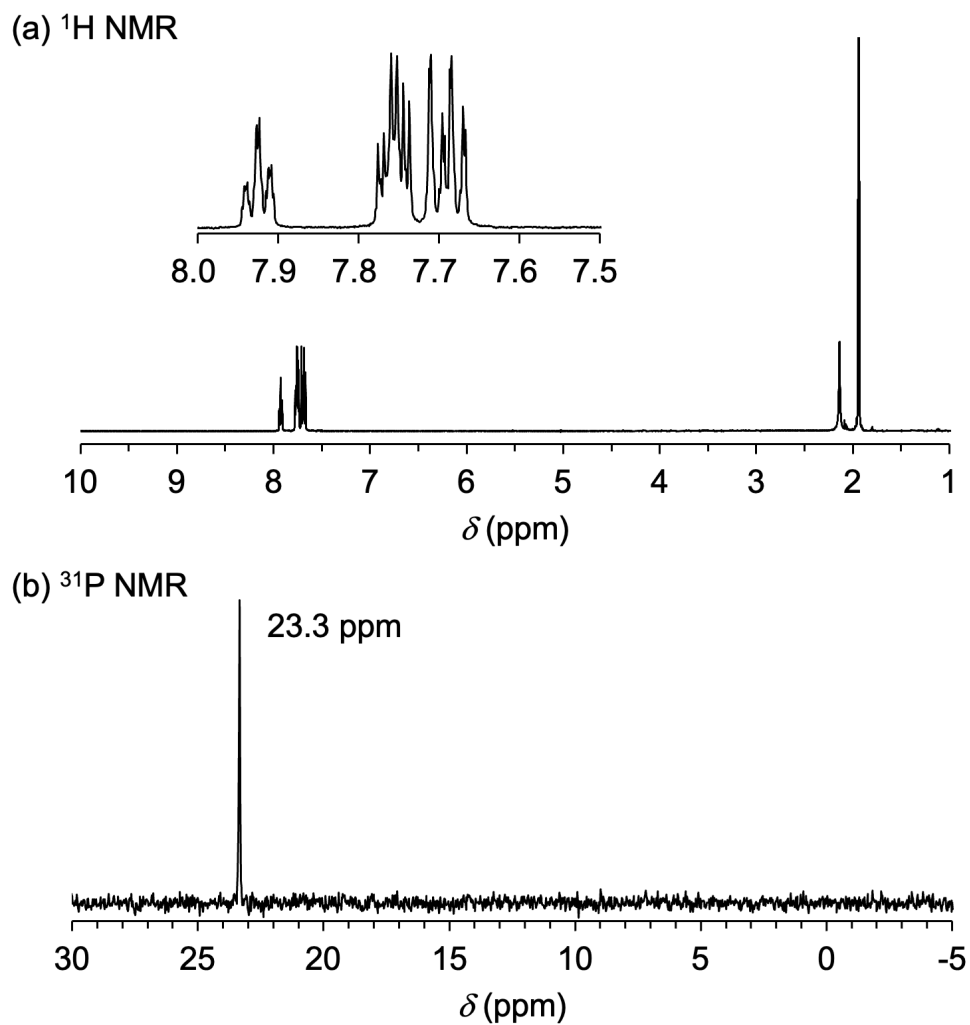

**Fig. S5** (a)  $^1\text{H}$  and (b)  $^{31}\text{P}$  NMR spectra of TPPW10 in  $\text{CD}_3\text{CN}$ .

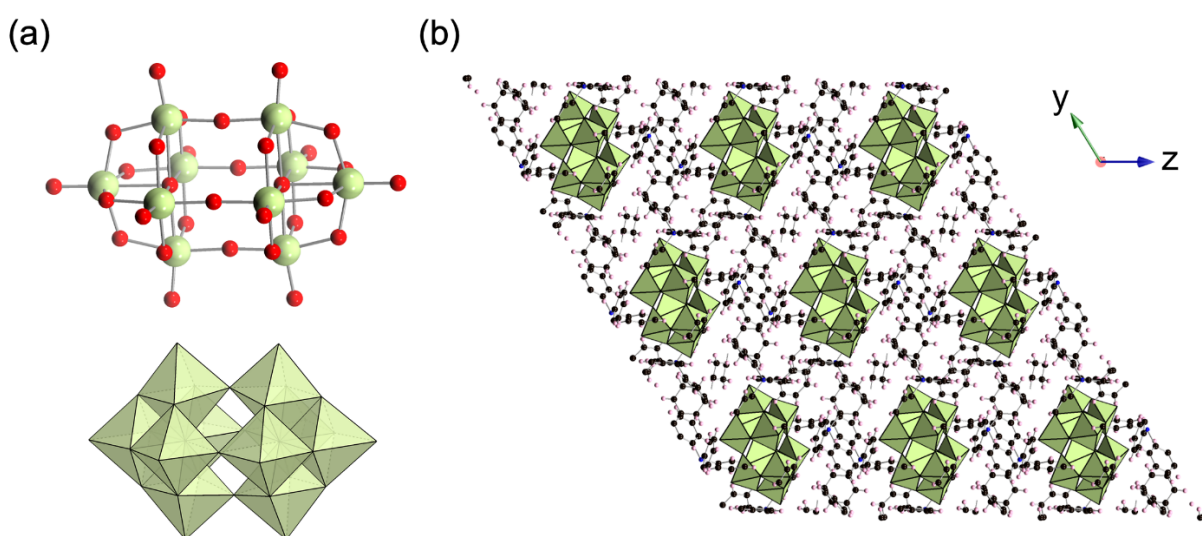

**Fig. S6** Crystal structure of TPPW10: (a) anion structures and (b) packing structures (color code: W, green; O, red; C, black; P, blue; H, pink;  $\{\text{WO}_6\}$ , green octahedra).

### 3. Photocatalytic reaction setup

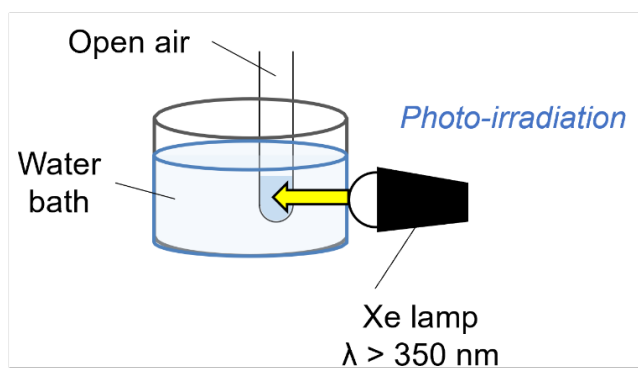

**Fig. S7** A reaction set up for the photocatalytic reaction.

#### 4. Recovery of TPPW10 after the photocatalytic reaction

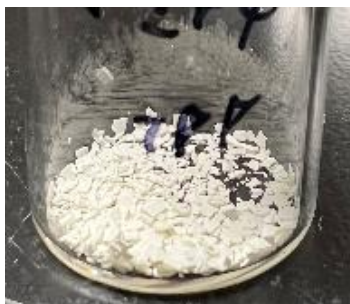

**Fig. S8** A photograph of the recovered TPPW10 after the photocatalytic aerobic  $\alpha$ -oxygenation of **1a**.

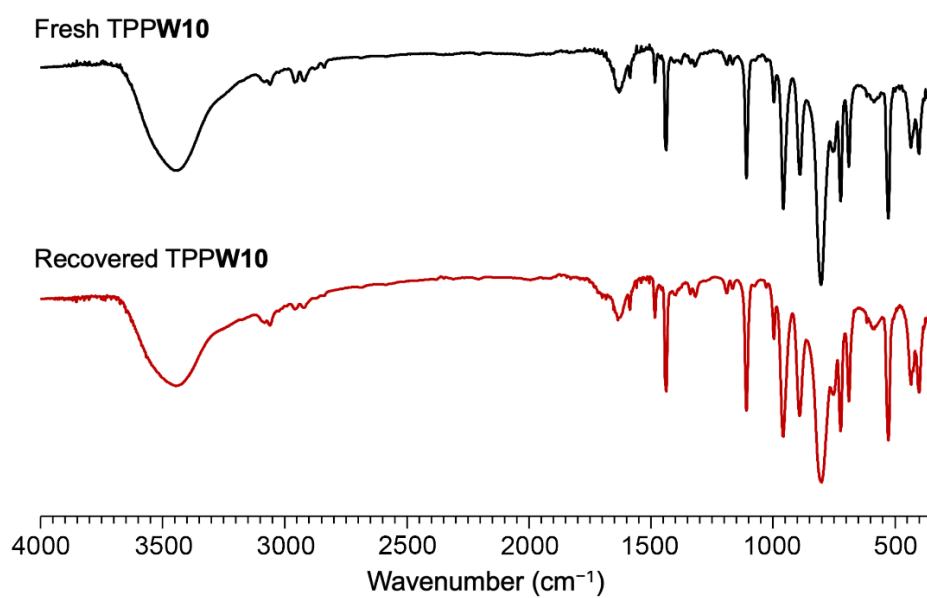

**Fig. S9** IR spectra of the fresh and recovered TPPW10 after the photocatalytic aerobic  $\alpha$ -oxygenation of **1a** (KBr disc).



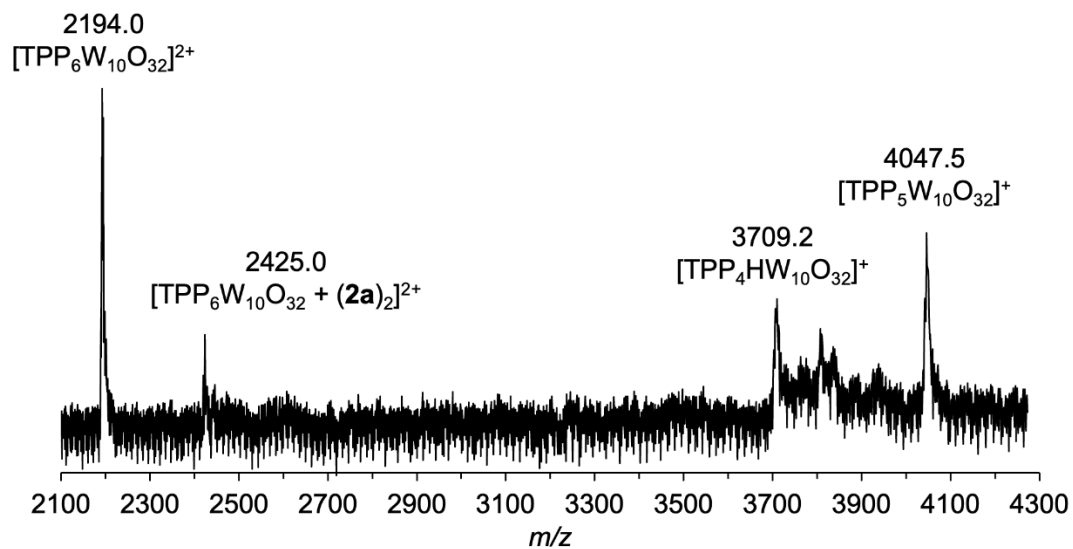

**Fig. S10** ESI-MS spectrum of the recovered TPPW10 in  $\text{CH}_3\text{CN}$  after the photocatalytic aerobic  $\alpha$ -oxygenation of **1a**.

## 5. Degradation of TBAW10 after the photocatalytic reaction

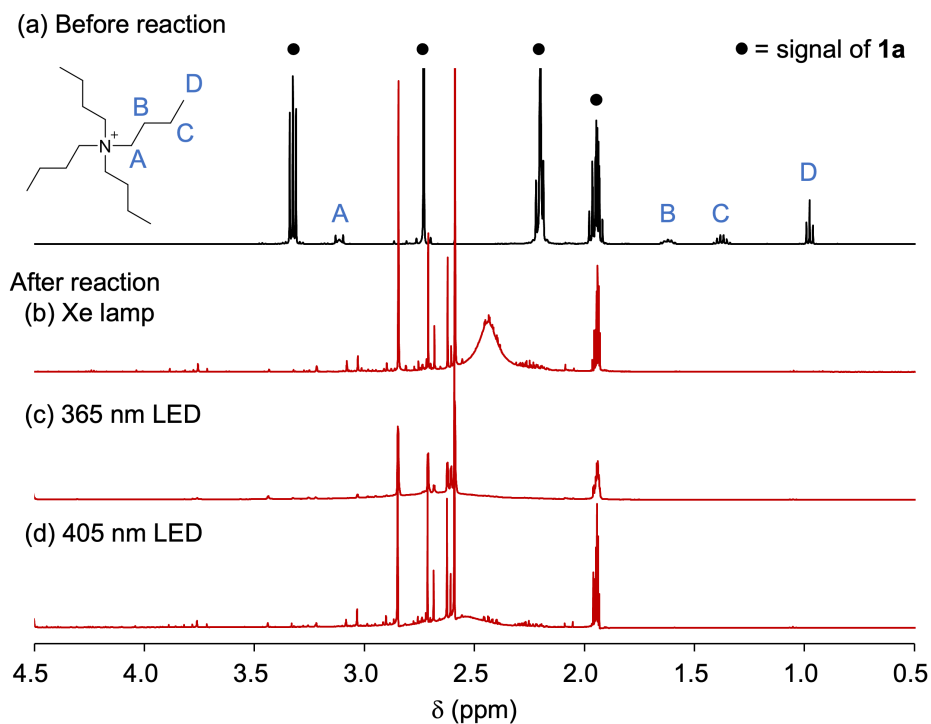

**Fig. S11** <sup>1</sup>H NMR spectra of TBAW10 in CD<sub>3</sub>CN before and after the photocatalytic aerobic α-oxygenation of **1a**. (a) Before the reaction, (b) after the reaction using Xe lamp, (c) after the reaction using 365 nm LED, and (d) after the reaction using 405 nm LED. The degradation of TBA was observed after the photocatalytic reaction using both Xe lamp and LED.

## 6. $^{18}\text{O}$ isotope labelling experiments

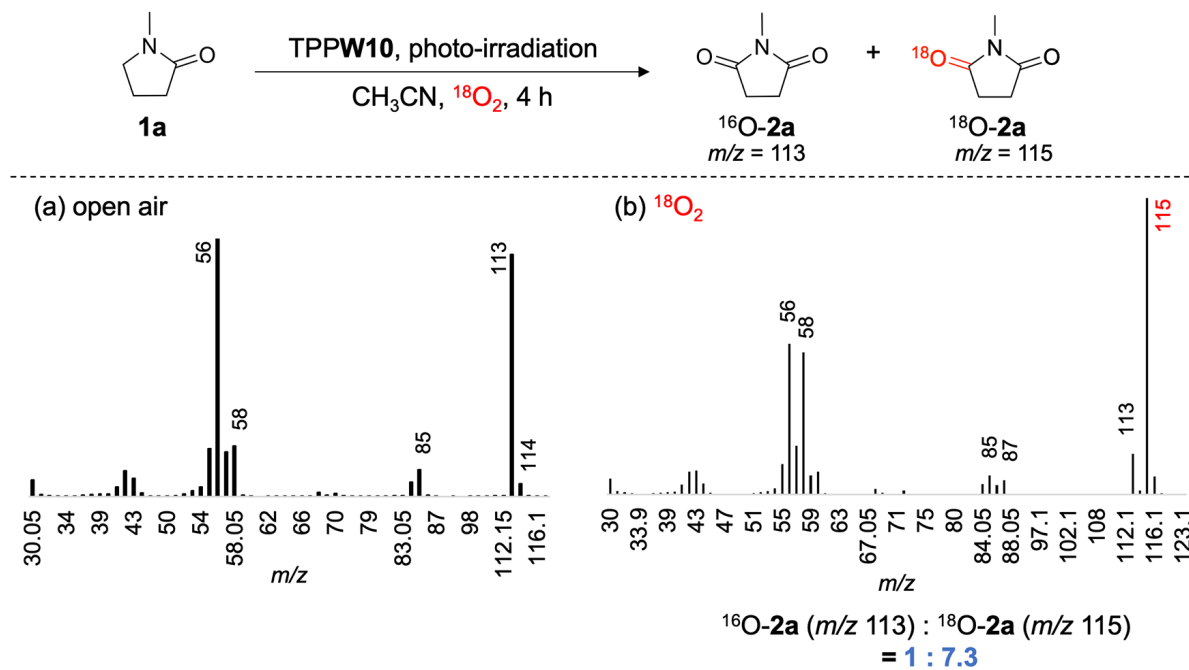

**Fig. S12** GC-MS spectra of the product **2a** when the  $\alpha$ -oxygenation of **1a** using TPPW10 (0.7 mol%) was performed under (a) open air and (b)  $^{18}\text{O}_2$  atmosphere.

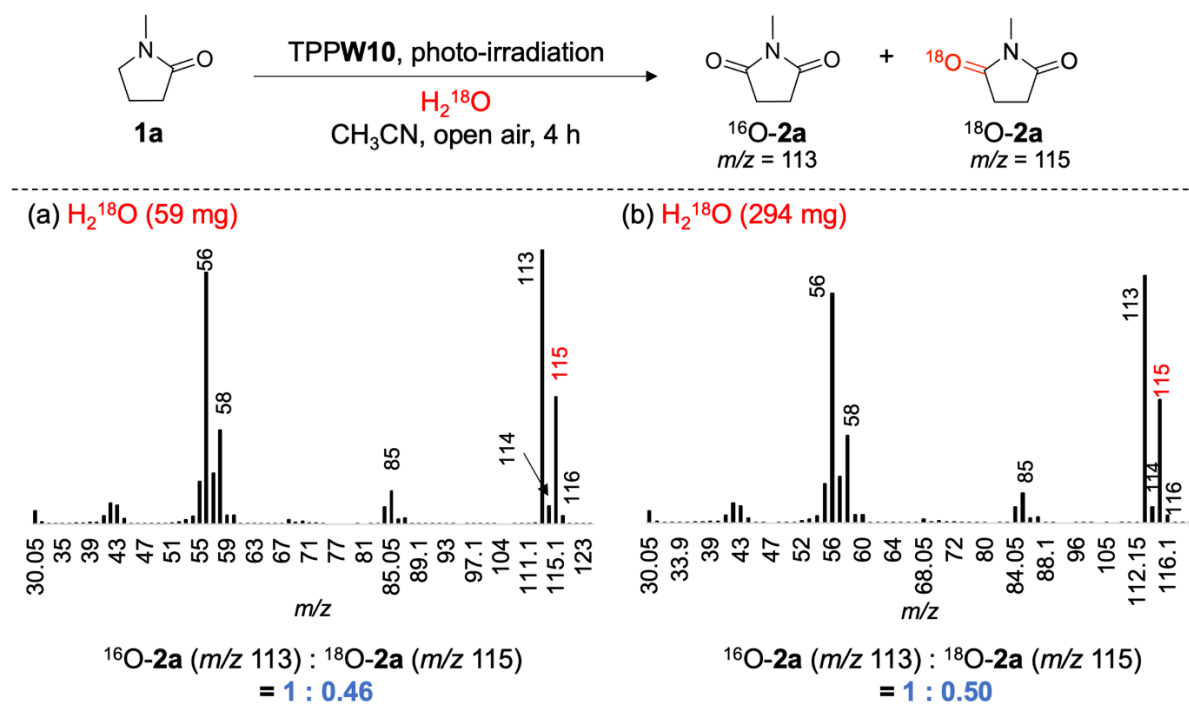

**Fig. S13** GC-MS spectra of the product **2a** when the  $\alpha$ -oxygenation of **1a** using TPPW10 (0.7 mol%) was performed in the presence of  $\text{H}_2^{18}\text{O}$  (a, 59 mg; b, 294 mg).

## 7. Comparison with previously reported photocatalytic systems

**Table S1.** Reported photocatalytic systems for direct imides synthesis via  $\alpha$ -oxygenation of amides.

| Photocatalyst                                                 | Additive                       | Oxidant, O source                      | Time (h)      | Scope                                                              | Product and yield                                                                            | Ref.             |
|---------------------------------------------------------------|--------------------------------|----------------------------------------|---------------|--------------------------------------------------------------------|----------------------------------------------------------------------------------------------|------------------|
| TPPW10 (0.7 mol%)                                             | –                              | O <sub>2</sub>                         | 4             | Lactams, aliphatic amides, benzamides, benzylamides                | 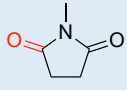<br>83%   | <b>This work</b> |
| Benzophenone (25 mol%)                                        | –                              | O <sub>2</sub>                         | Not described | Lactams                                                            | <br>60%   | S7               |
| TiO <sub>2</sub> (0.5 mol%)                                   | –                              | O <sub>2</sub>                         | 48            | Lactams                                                            |                                                                                              | S8               |
| I <sub>2</sub> (1 mol%)                                       | –                              | O <sub>2</sub>                         | 48            | Benzylamides                                                       | <br>71%   | S9               |
| 48% HBr aq (5 mol%)                                           | Ca(OH) <sub>2</sub> (2.5 mol%) | O <sub>2</sub>                         | 10            | Benzylamides                                                       | <br>96%  | S10              |
| 2-Chloroanthraquinone (10 mol%)                               | –                              | O <sub>2</sub>                         | 10            | Benzylamides                                                       | <br>95% | S11              |
| KBr (30 mol%)                                                 | –                              | Oxone (2 mol%)                         | 7             | <i>N</i> -alkylbenzamides, lactams, aliphatic amides, benzylamides | <br>85% | S12              |
| <i>N</i> -bromosuccinimide (NBS) (200 mol%)                   | –                              | H <sub>2</sub> O                       | 1             | <i>N</i> -alkylbenzamides, benzylamides                            | <br>91% | S13              |
| CuCl <sub>2</sub> (5 mol%)                                    | NH <sub>4</sub> Cl (20 mol%)   | O <sub>2</sub> , H <sub>2</sub> O      | 72            | Benzamides, etc.                                                   | <br>83% | S14              |
| Fe(NO <sub>3</sub> ) <sub>3</sub> ·9H <sub>2</sub> O (8 mol%) | NaBrO <sub>3</sub> (200 mol%)  | O <sub>2</sub> , H <sub>2</sub> O, •OH | 12            | Benzylamides, benzamide, aliphatic amides                          | <br>94% | S15              |

## 8. Radical scavenger test

**Table S2.** Effect of radical scavenger for the photocatalytic  $\alpha$ -oxygenation of **1a** using TPPW10.<sup>a</sup>

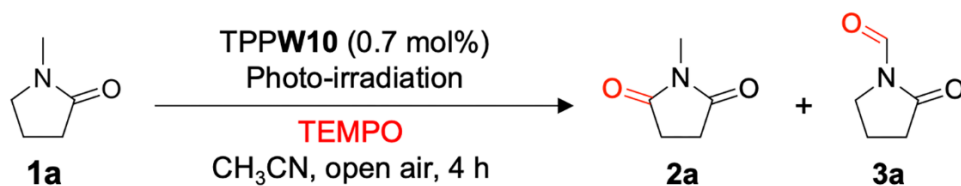

| Entry | Radical scavenger | Conv. (%) of <b>1a</b> | Yield (%) |           |
|-------|-------------------|------------------------|-----------|-----------|
|       |                   |                        | <b>2a</b> | <b>3a</b> |
| 1     | –                 | >99                    | 83        | 1         |
| 2     | TEMPO             | 64                     | 3         | <1        |

<sup>a</sup> Reaction conditions: **1a** (0.6 mmol), photocatalyst (0.7 mol%), 2,2,6,6-tetramethylpiperidine 1-oxyl (TEMPO, 2 equivalents with respect to **1a**), acetonitrile (3 mL), open air, 4 h, photo-irradiation by Xe lamp ( $\lambda > 350$  nm). Conversions and yields were determined by GC using *N*-methylphthalimide as an internal standard.

## 9. Product data

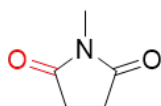

**2a** (CAS No. 1121-07-9): GC conditions and analysis: InertCap5 capillary column (df = 0.25  $\mu$  m, I.D. = 0.25 mm, 30 m, GL Science Inc.); carrier gas (N<sub>2</sub>) flow rate, 1.6 mL/min; initial column temp., 50 °C; final column temp., 280 °C; progress rate, 10 °C min<sup>-1</sup> (10 min), 20 °C min<sup>-1</sup> (6.5 min); injection temp., 250 °C; detection temp., 280 °C; retention time, 5.33 min. MS (EI) *m/z* (%): 114 (5), 113 (94) [*M*<sup>+</sup>], 85 (11), 84 (6), 58 (20), 57 (17), 56 (100), 55(19), 43 (7), 42 (10), 30(6).<sup>S16</sup> <sup>1</sup>H NMR (500 MHz, CD<sub>3</sub>CN, TMS)  $\delta$ : 2.85 (s, 3H, -CH<sub>3</sub>), 2.59 (s, 4H, -CH<sub>2</sub>-) ppm. <sup>13</sup>C NMR (125 MHz, CD<sub>3</sub>CN, TMS):  $\delta$  178.9, 28.9, 24.9 ppm. Isolated as white solid (Isolated yield: 34%; silica gel column chromatography; ethyl acetate/*n*-hexane = 1/0.5, *R*<sub>f</sub> = 0.32).

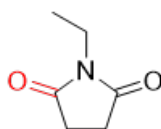

**2b** (CAS No. 2314-78-5): GC conditions and analysis: InertCap5 capillary column (df = 0.25  $\mu$  m, I.D. = 0.25 mm, 30 m, GL Science Inc.); carrier gas (N<sub>2</sub>) flow rate, 1.6 mL/min; initial column temp., 50 °C; final column temp., 280 °C; progress rate, 10 °C min<sup>-1</sup> (10 min), 20 °C min<sup>-1</sup> (6.5 min); injection temp., 250 °C; detection temp., 280 °C; retention time, 5.97 min. MS (EI) *m/z* (%): 128(7), 127 (93) [*M*<sup>+</sup>], 112(15), 100(5), 99 (23), 84 (60), 71(7), 70 (11), 57 (18), 56 (100), 55 (38), 44 (15), 42 (16), 41 (16), 30(10).<sup>S17</sup>

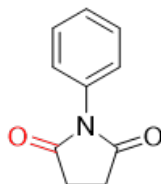

**2c** (CAS No. 83-25-0): GC conditions and analysis: InertCap5 capillary column (df = 0.25  $\mu$  m, I.D. = 0.25 mm, 30 m, GL Science Inc.); carrier gas (N<sub>2</sub>) flow rate, 1.6 mL/min; initial column temp., 50 °C; final column temp., 280 °C; progress rate, 10 °C min<sup>-1</sup> (10 min), 20 °C min<sup>-1</sup> (6.5 min); injection temp., 250 °C; detection temp., 280 °C; retention time, 12.2 min. MS (EI) *m/z* (%): 176 (12), 175 (100) [*M*<sup>+</sup>], 147 (12), 146 (9), 130(7), 120 (31), 119 (65), 118 (13), 104(9), 93 (37), 92 (20), 91 (20), 77 (26), 64 (16), 63(8), 56(22), 55 (30), 51 (10), 39(6).<sup>S16</sup>

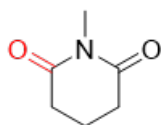

**2d** (CAS No. 25077-25-2): GC conditions and analysis: InertCap5 capillary column (df = 0.25  $\mu$  m, I.D. = 0.25 mm, 30 m, GL Science Inc.); carrier gas (N<sub>2</sub>) flow rate, 1.6 mL/min; initial column temp., 50 °C; final column temp., 280 °C; progress rate, 10 °C min<sup>-1</sup> (10 min), 20 °C min<sup>-1</sup> (6.5 min); injection temp., 250 °C; detection temp., 280 °C; retention time, 6.76 min. MS (EI) *m/z* (%): 127 (62) [*M*<sup>+</sup>], 99(9), 98 (20), 71 (12), 70 (22), 58 (9), 55 (15), 43 (12), 41 (100), 41 (12), 39(11).<sup>S18</sup>

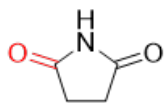

**2e** (CAS No. 123-56-8): GC conditions and analysis: InertCap5 capillary column (df = 0.25  $\mu\text{m}$ , I.D. = 0.25 mm, 30 m, GL Science Inc.); carrier gas ( $\text{N}_2$ ) flow rate, 1.6 mL/min; initial column temp., 50  $^\circ\text{C}$ ; final column temp., 280  $^\circ\text{C}$ ; progress rate, 10  $^\circ\text{C min}^{-1}$  (10 min), 20  $^\circ\text{C min}^{-1}$  (6.5 min); injection temp., 250  $^\circ\text{C}$ ; detection temp., 280  $^\circ\text{C}$ ; retention time, 5.84 min. MS (EI)  $m/z$  (%): 100 (5), 99 (100) [ $M^+$ ], 70 (6), 56 (84), 55 (8), 42 (6.6).  $^{18}\text{H}$  NMR (500 MHz,  $\text{CD}_3\text{CN}$ , TMS)  $\delta$ : 9.02 (s, 1H, -NH-), 2.62 (s, 4H, - $\text{CH}_2$ -) ppm.  $^{13}\text{C}$  NMR (125 MHz,  $\text{CD}_3\text{CN}$ , TMS):  $\delta$  179.8, 30.4 ppm. Isolated as white solid (Isolated yield: 69%, silica gel column chromatography; ethyl acetate/*n*-hexane = 1/0.2,  $R_f$  = 0.29).

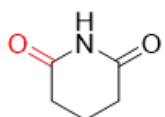

**2f** (CAS No. 1121-89-7): GC conditions and analysis: InertCap5 capillary column (df = 0.25  $\mu\text{m}$ , I.D. = 0.25 mm, 30 m, GL Science Inc.); carrier gas ( $\text{N}_2$ ) flow rate, 1.6 mL/min; initial column temp., 50  $^\circ\text{C}$ ; final column temp., 280  $^\circ\text{C}$ ; progress rate, 10  $^\circ\text{C min}^{-1}$  (10 min), 20  $^\circ\text{C min}^{-1}$  (6.5 min); injection temp., 250  $^\circ\text{C}$ ; detection temp., 280  $^\circ\text{C}$ ; retention time, 6.64 min. MS (EI)  $m/z$  (%): 114(3), 113 (48) [ $M^+$ ], 70 (33), 55 (2), 44 (2), 43 (5), 42 (100), 41 (10), 39 (9).  $^{19}\text{H}$  NMR (500 MHz,  $\text{CD}_3\text{CN}$ , TMS)  $\delta$ : 8.74 (brs, 1H, -NH-), 2.48 (t,  $J$  = 6.5 Hz, 4H), 1.94-1.89 (m, 2H).  $^{13}\text{C}$  NMR (125 MHz,  $\text{CD}_3\text{CN}$ , TMS):  $\delta$  174.4, 32.1, 18.5 ppm. Isolated as white solid (Isolated yield: 46%, Silica gel column chromatography; ethyl acetate/*n*-hexane = 1/0.5,  $R_f$  = 0.21).

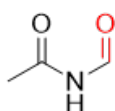

**2g** (CAS No. 21163-79-1): GC conditions and analysis: InertCap5 capillary column (df = 0.25  $\mu\text{m}$ , I.D. = 0.25 mm, 30 m, GL Science Inc.); carrier gas ( $\text{N}_2$ ) flow rate, 1.6 mL/min; initial column temp., 50  $^\circ\text{C}$ ; final column temp., 280  $^\circ\text{C}$ ; progress rate, 10  $^\circ\text{C min}^{-1}$  (10 min), 20  $^\circ\text{C min}^{-1}$  (6.5 min); injection temp., 250  $^\circ\text{C}$ ; detection temp., 280  $^\circ\text{C}$ ; retention time, 3.16 min. MS (EI)  $m/z$  (%): 87 (8) [ $M^+$ ], 59 (100), 44 (47), 43 (86), 42 (23), 41 (5).<sup>S20</sup>

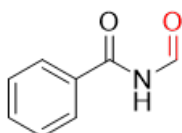

**2h** (CAS No. 4252-31-7): GC conditions and analysis: InertCap5 capillary column (df = 0.25  $\mu\text{m}$ , I.D. = 0.25 mm, 30 m, GL Science Inc.); carrier gas ( $\text{N}_2$ ) flow rate, 1.6 mL/min; initial column temp., 50  $^\circ\text{C}$ ; final column temp., 280  $^\circ\text{C}$ ; progress rate, 10  $^\circ\text{C min}^{-1}$  (10 min), 20  $^\circ\text{C min}^{-1}$  (6.5 min); injection temp., 250  $^\circ\text{C}$ ; detection temp., 280  $^\circ\text{C}$ ;

retention time, 10.2 min. MS (EI)  $m/z$  (%): 149 (9) [ $M^+$ ], 121 (50), 106 (8), 105 (100), 104 (7), 103 (7), 78 (8), 77 (81), 51 (32), 50 (13).  $^1\text{H}$  NMR (500 MHz,  $\text{CD}_3\text{CN}$ , TMS)  $\delta$ : 9.69 (brs, 1H, -NH-), 9.27 (d,  $J = 9.5$  Hz, 1H, -CHO-), 7.94-7.92 (m, 2H, Ar-H), 7.67 (t,  $J = 7.5$  Hz, 1H, Ar-H), 7.54 (t,  $J = 8.0$  Hz, 2H, Ar-H) ppm.  $^{13}\text{C}$  NMR (125 MHz,  $\text{CD}_3\text{CN}$ , TMS):  $\delta$  168.2, 164.4, 134.5, 132.8, 129.8, 129.1 ppm. Isolated as white solid (Isolated yield: 31%, silica gel column chromatography; ethyl acetate/*n*-hexane = 1/0.7,  $R_f = 0.42$ ).

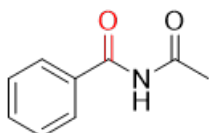

**2i** (CAS No. 1575-95-7): GC conditions and analysis: InertCap5 capillary column (df = 0.25  $\mu\text{m}$ , I.D. = 0.25 mm, 30 m, GL Science Inc.); carrier gas ( $\text{N}_2$ ) flow rate, 1.6 mL/min; initial column temp., 50  $^\circ\text{C}$ ; final column temp., 280  $^\circ\text{C}$ ; progress rate, 10  $^\circ\text{C min}^{-1}$  (10 min), 20  $^\circ\text{C min}^{-1}$  (6.5 min); injection temp., 250  $^\circ\text{C}$ ; detection temp., 280  $^\circ\text{C}$ ; retention time, 10.5 min. MS (EI)  $m/z$  (%): 163(22) [ $M^+$ ], 162(24), 70 (33), 106 (9), 105 (100), 77 (51), 51 (18), 50 (6), 43 (23).<sup>S22</sup>  $^1\text{H}$  NMR (500 MHz,  $\text{CD}_3\text{CN}$ , TMS)  $\delta$ : 9.30 (brs, 1H, -NH-), 7.87 (d,  $J = 7.5$  Hz, 2H, Ar-H), 7.61 (t,  $J = 7.5$  Hz, 1H, Ar-H), 7.50 (t,  $J = 8.0$  Hz, 2H, Ar-H), 2.41 (s, 3H, -CH<sub>3</sub>) ppm.  $^{13}\text{C}$  NMR (125 MHz,  $\text{CD}_3\text{CN}$ , TMS):  $\delta$  173.3, 167.2, 134.3, 133.8, 129.6, 129.0, 25.8 ppm. Isolated as white solid (Isolated yield: 45%, silica gel column chromatography; ethyl acetate/*n*-hexane = 1/3,  $R_f = 0.21$ ).

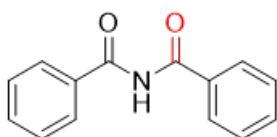

**2j** (CAS No. 614-28-8): GC conditions and analysis: InertCap5 capillary column (df = 0.25  $\mu\text{m}$ , I.D. = 0.25 mm, 30 m, GL Science Inc.); carrier gas ( $\text{N}_2$ ) flow rate, 1.6 mL/min; initial column temp., 50  $^\circ\text{C}$ ; final column temp., 280  $^\circ\text{C}$ ; progress rate, 10  $^\circ\text{C min}^{-1}$  (10 min), 20  $^\circ\text{C min}^{-1}$  (6.5 min); injection temp., 250  $^\circ\text{C}$ ; detection temp., 280  $^\circ\text{C}$ ; retention time, 14.9 min. MS (EI)  $m/z$  (%): 225 (18) [ $M^+$ ], 207 (16), 197 (10), 122 (19), 105 (100), 103 (55), 77 (61), 76 (24), 51 (24), 50 (15).<sup>S22,S23</sup>

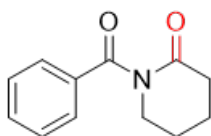

**2k** (CAS No. 4252-56-6): GC conditions and analysis: InertCap5 capillary column (df = 0.25  $\mu\text{m}$ , I.D. = 0.25 mm, 30 m, GL Science Inc.); carrier gas ( $\text{N}_2$ ) flow rate, 1.6 mL/min; initial column temp., 50  $^\circ\text{C}$ ; final column temp., 280  $^\circ\text{C}$ ; progress rate, 10  $^\circ\text{C min}^{-1}$  (10 min), 20  $^\circ\text{C min}^{-1}$  (6.5 min); injection temp., 250  $^\circ\text{C}$ ; detection temp., 280  $^\circ\text{C}$ ; retention time, 13.4 min. MS (EI)  $m/z$  (%): 203 (10) [ $M^+$ ], 202 (9), 175 (12), 146 (3), 105 (100), 77 (49), 51 (12).<sup>S23</sup>



# $^1\text{H}$ and $^{13}\text{C}$ NMR spectra of products

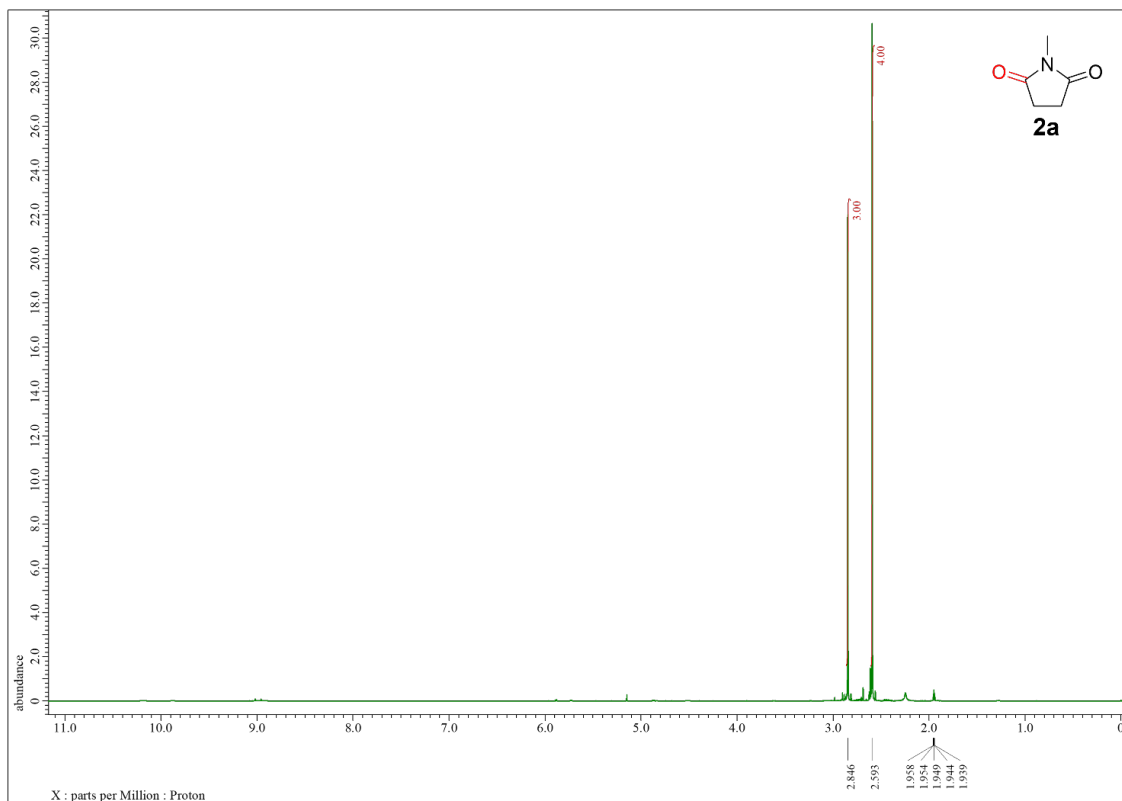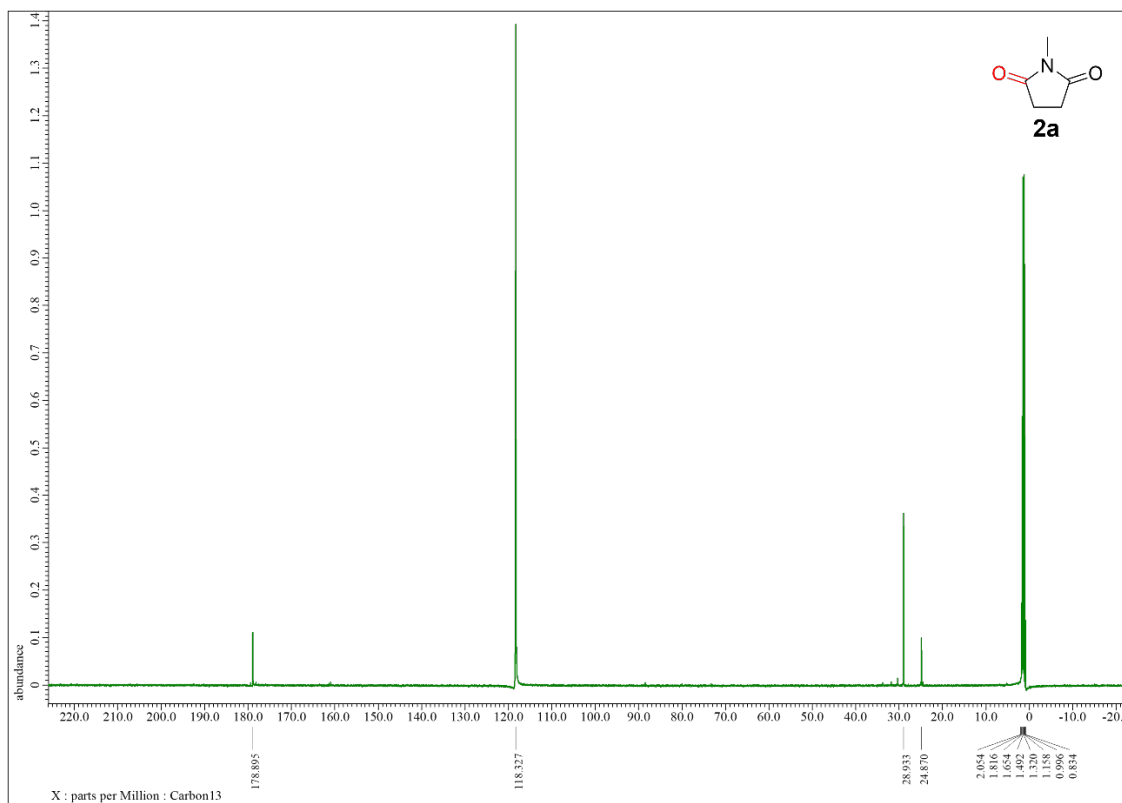

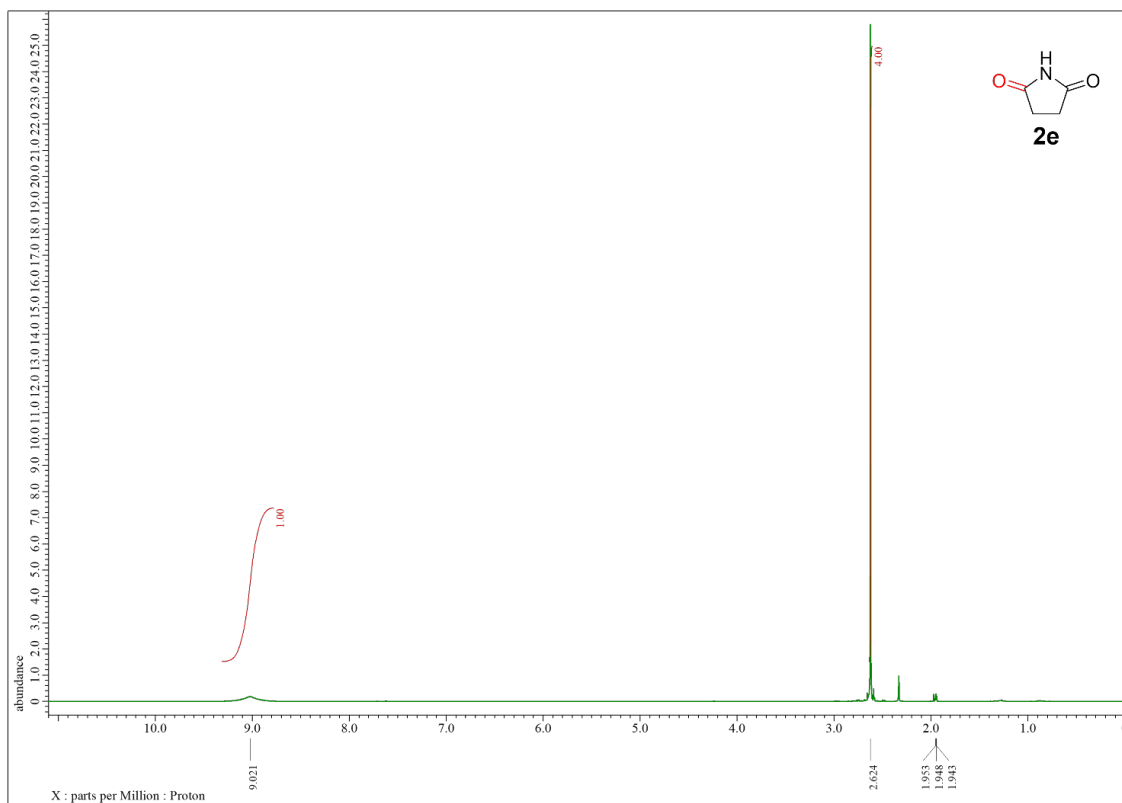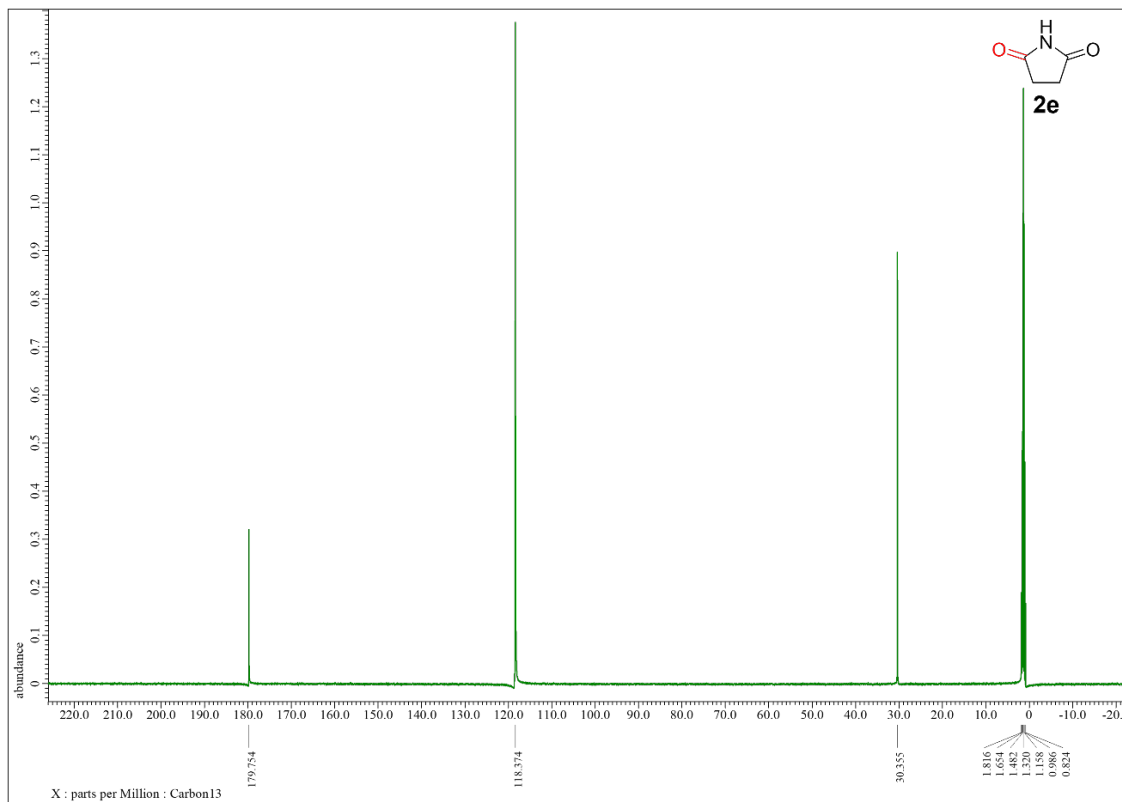

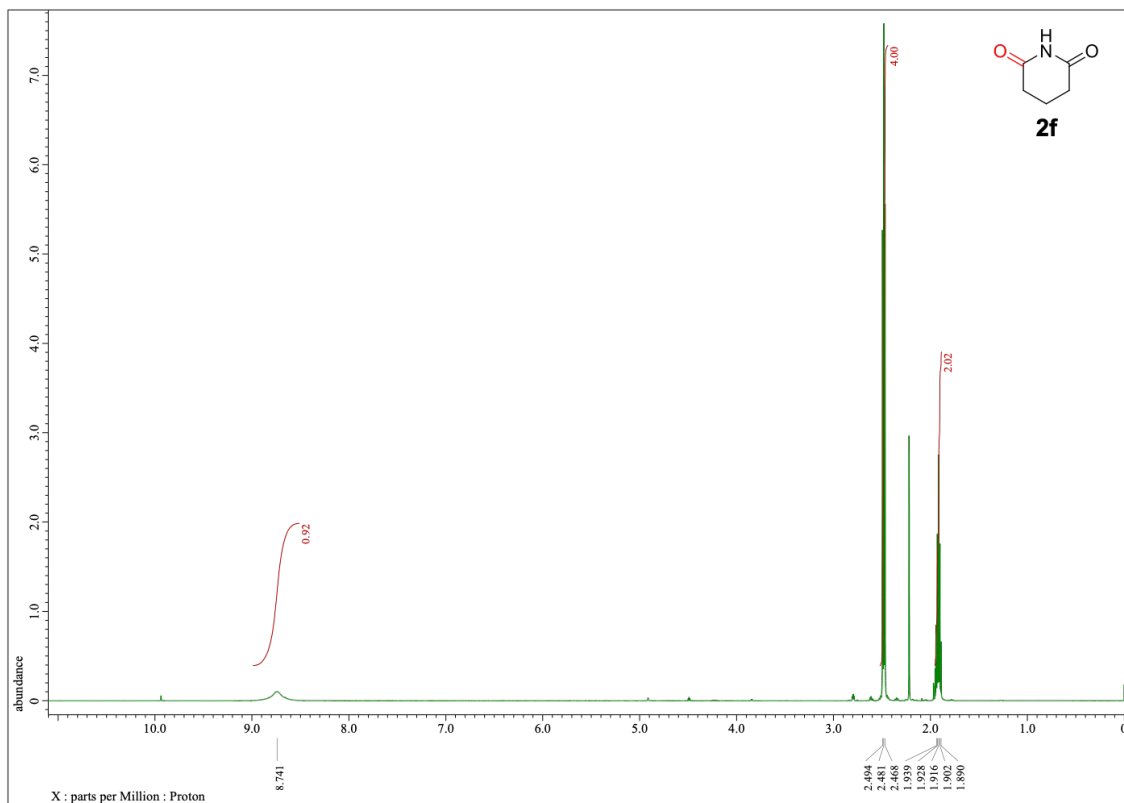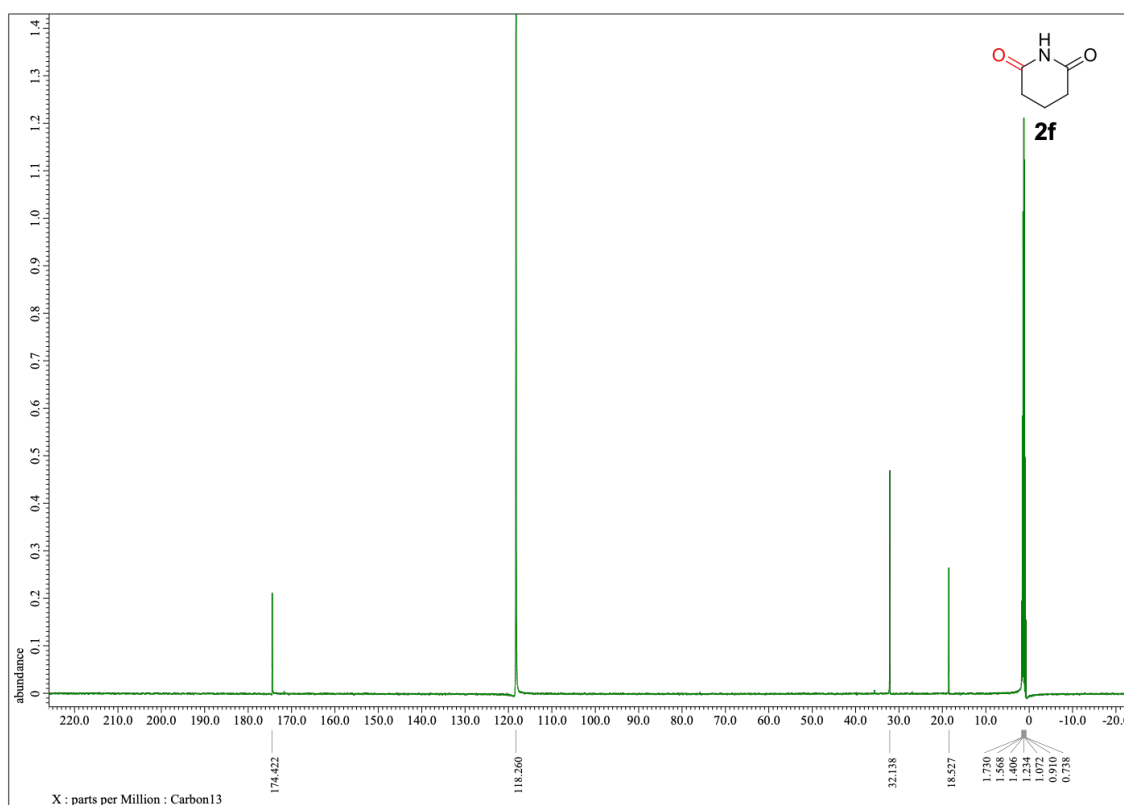

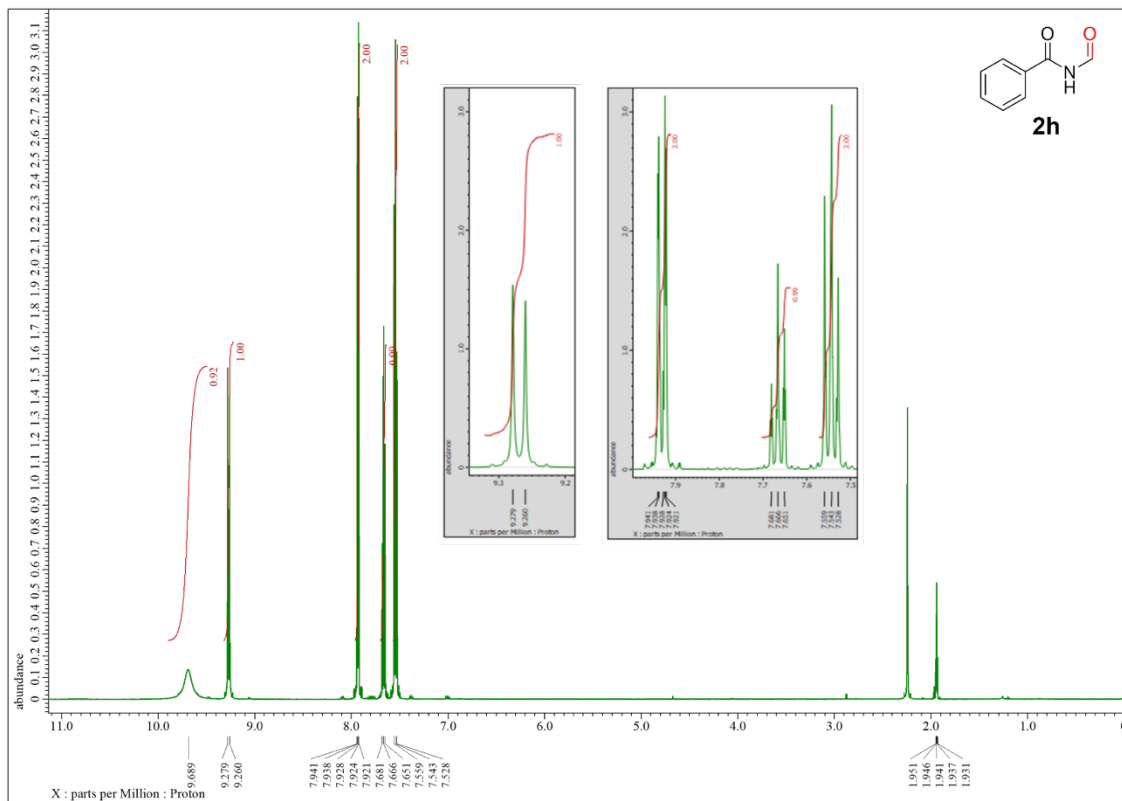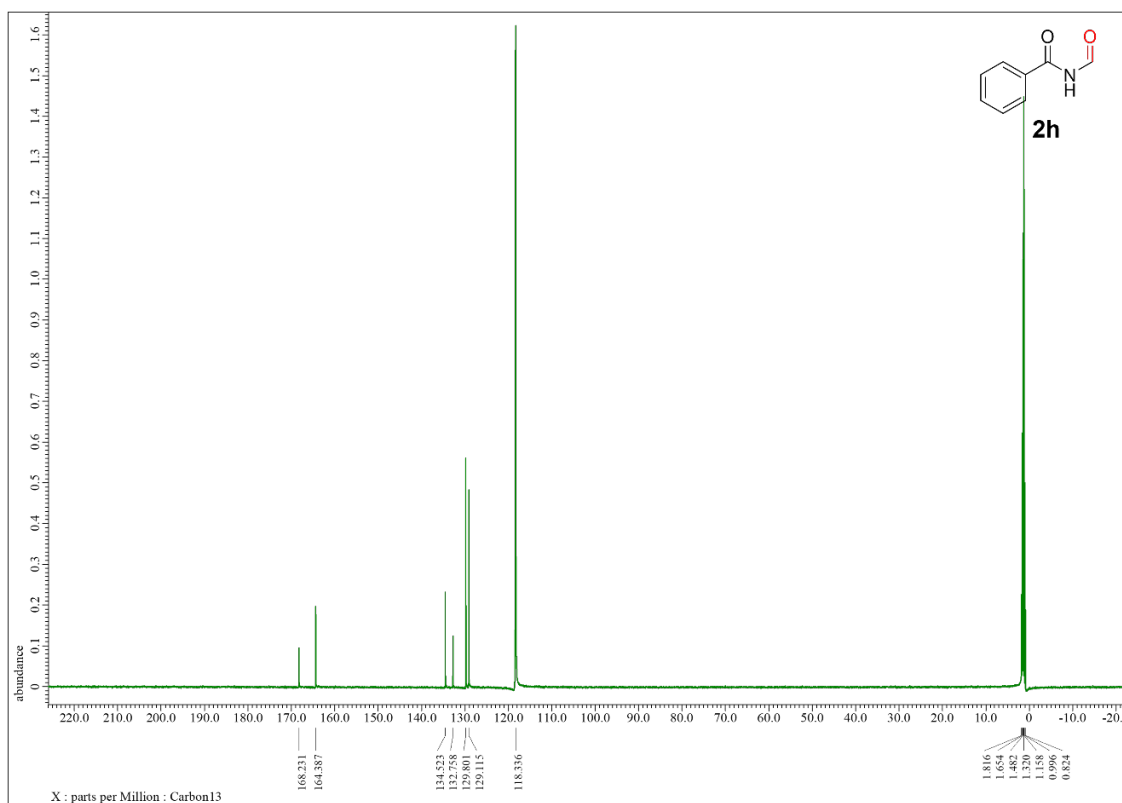

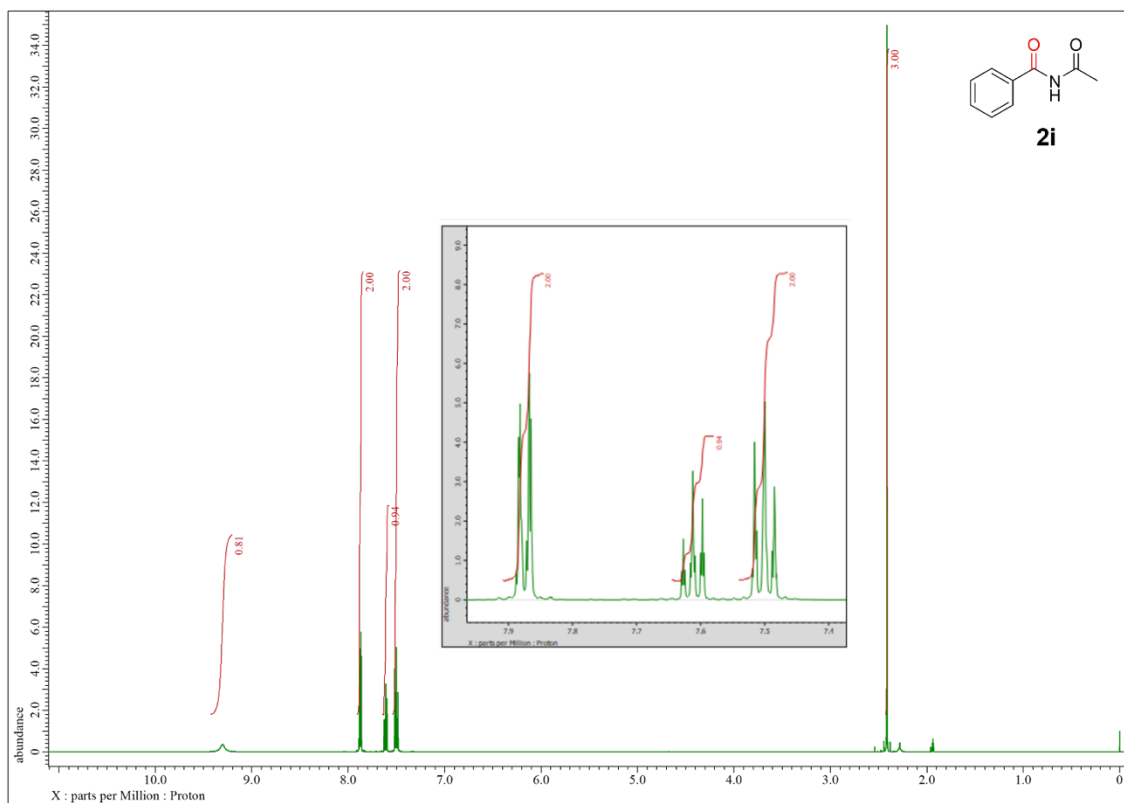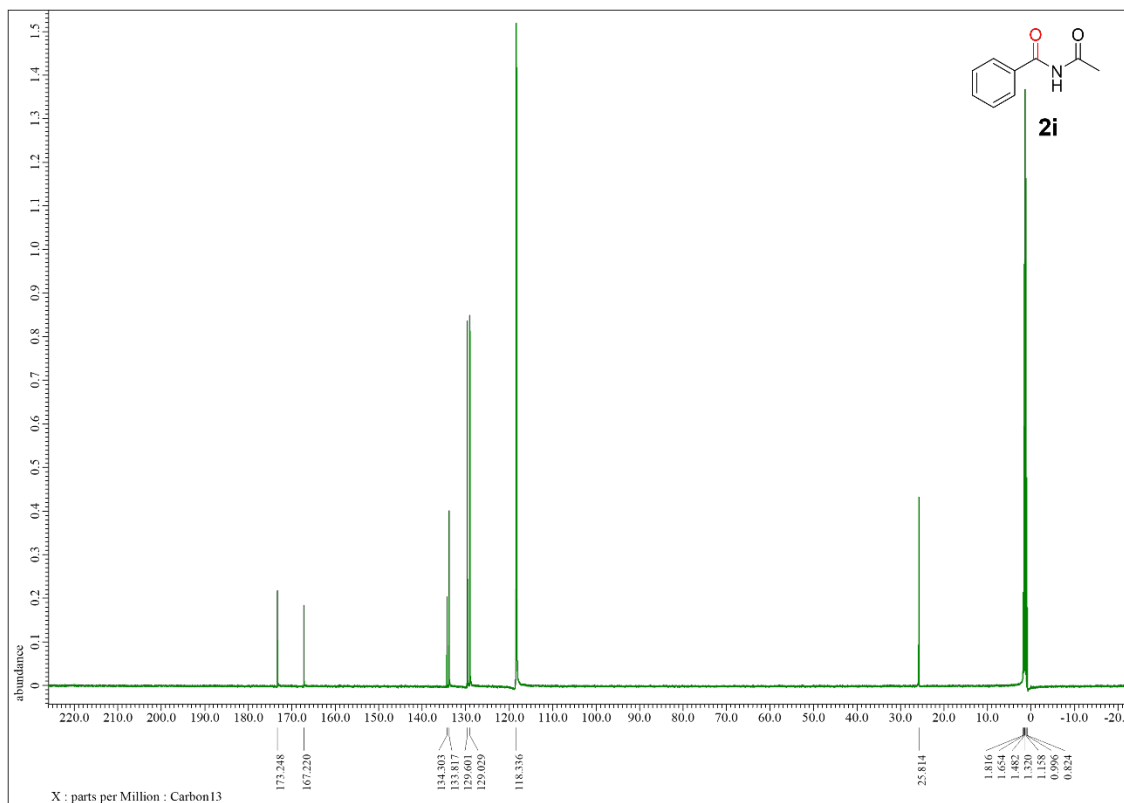

## 10. References

- S1 M. Fournier, *Inorg. Synth.*, 1990, **27**, 81.
- S2 E. Takahashi, K. Kamata, Y. Kikukawa, S. Sato, K. Suzuki, K. Yamaguchi and N. Mizuno, *Catal. Sci. Technol.*, 2015, **5**, 4778.
- S3 (a) P. J. Domaille, *Inorg. Synth.*, 1990, **27**, 101; (b) P. J. Domaille, *Inorg. Synth.*, 1990, **27**, 102; (c) K. Kamata, K. Yonehara, Y. Nakagawa, K. Uehara and N. Mizuno, *Nat. Chem.*, 2010, **2**, 478.
- S4 Rigaku OD. CrysAlis PRO. Rigaku Oxford Diffraction Ltd, Yarnton, England (2018).
- S5 O. V. Dolomanov, L. J. Bourhis, R. J. Gildea, J. A. Howard and H. Puschmann, *J. Appl. Crystallogr.*, 2009, **42**, 339.
- S6 (a) G. M. Sheldrick, *Acta Cryst.*, 2008, **A64**, 112; (b) G. M. Sheldrick, *Acta Cryst.*, 2015, **C71**, 3.
- S7 J. C. Gramain, R. Remuson and Y. Troin, *J. Chem. Soc., Chem. Commun.*, 1976, 194.
- S8 J. W. Pavlik and S. Tantayanon, *J. Am. Chem. Soc.*, 1981, **103**, 6755.
- S9 H. Nakayama and A. Itoh, *Synlett*, 2008, **5**, 675.
- S10 N. Tada, K. Ban, M. Yoshida, S. Hirashima, T. Miura and A. Itoh, *Tetrahedron Lett.*, 2010, **51**, 6098.
- S11 I. Itoh, Y. Matsusaki, A. Fujiya, T. Miura and A. Itoh, *Tetrahedron Lett.*, 2014, **55**, 3160.
- S12 C. Mei, Y. Hu and W. Lu, *Synthesis*, 2018, **50**, 2999.
- S13 H. Chang, X. He, Z. Zhang, C. Zhou and G. Cai, *Asian J. Org. Chem.*, 2022, **11**, e202200500.
- S14 P. Lian, R. Li, L. Wang, X. Wan, Z. Xiang and X. Wan, *Org. Chem. Front.*, 2022, **9**, 4924.
- S15 S. Liu, Z. Dong, Z. Zang, C. Zhou and G. Cai, *Org. Biomol. Chem.*, 2024, **22**, 1205.
- S16 T. Hirata, A. Takarada, M. E. F. Hegazy, Y. Sato, A. Matsushima, Y. Kondo, A. Matsuki and H. Hamada, *J. Mol. Catal. B: Enzym.*, 2005, **32**, 131.
- S17 M. Wang and W. Chen, *React. Kinet. Catal. Lett.*, 2006, **89**, 377.
- S18 A. Maquestiau and P. Lejeune, *Bull. Soc. Chim. Belges*, 1969, **78**, 309.
- S19 E. Benjamin and Y. Hijji, *Molecules*, 2008, **13**, 157.
- S20 Y. L. Chow and J. N. Tam, *J. Chem. Soc. C*, 1970, 1138.
- S21 F. Bai, N. Wang, Y. Bai, X. Ma, C. Gu, B. Dai and J. Chen, *J. Org. Chem.*, 2023, **88**, 2985.
- S22 F. Martinelli, A. Palmieri and M. Petrini, *Eur. J. Org. Chem.*, 2010, **26**, 5058.
- S23 K. Kataoka, K. Wachi, X. Jin, K. Suzuki, Y. Iwabuchi, J. Hasegawa, N. Mizuno, K. Yamaguchi, *Chem. Sci.*, 2018, **9**, 4756.
